# Supplementary material for: PrEP awareness and decision-making for Latino MSM in San Antonio, Texas
Source: PLOS journal article supplement (doi:10.1371/journal.pone.0184014), 2017-09-27
Supplement: S3 (10.1371/journal.pone.0184014.s003) [file journal.pone.0184014.s003]

**S3 Table. Descriptive characteristics of PrEP participants for self-administered Internet surveys (N = 159).**

| <b>Characteristics</b>                                                         | <b><i>n</i></b> | <b><i>(%)</i></b> |
|--------------------------------------------------------------------------------|-----------------|-------------------|
| <b>Race</b>                                                                    |                 |                   |
| Latino/Spanish/Hispanic                                                        | 154             | (96.9)            |
| White & Latino/Spanish/Hispanic                                                | 4               | (2.5)             |
| Black & Latino/Spanish/Hispanic                                                | 1               | (0.6)             |
| <b>Ethnicity</b>                                                               |                 |                   |
| Mexican                                                                        | 147             | (92.5)            |
| Puerto Rican                                                                   | 6               | (3.8)             |
| Cuban                                                                          | 4               | (2.5)             |
| Spanish                                                                        | 2               | (1.3)             |
| Colombian                                                                      | 1               | (0.6)             |
| Venezuelan                                                                     | 1               | (0.6)             |
| <b>Country of Birth</b>                                                        |                 |                   |
| United States                                                                  | 147             | (92.5)            |
| Cuba                                                                           | 4               | (2.5)             |
| Mexico                                                                         | 5               | (3.1)             |
| Colombia                                                                       | 1               | (0.6)             |
| Venezuela                                                                      | 1               | (0.6)             |
| <b>Education</b>                                                               |                 |                   |
| Grade 1-11                                                                     | 0               |                   |
| Grade 12 - No Diploma                                                          | 1               | (0.6)             |
| Grade 12 - With Diploma                                                        | 23              | (14.5)            |
| GED or alternative credential                                                  | 2               | (1.3)             |
| Some college credit                                                            | 36              | (22.6)            |
| Associate's Degree                                                             | 9               | (5.7)             |
| Bachelor's Degree                                                              | 76              | (47.8)            |
| Master's Degree                                                                | 9               | (5.7)             |
| Professional degree beyond a Bachelor's Degree (for example: MD, DDS, DVM, JD) | 2               | (1.3)             |
| Doctorate Degree                                                               | 1               | (0.6)             |
| <b>Annual Household Income</b>                                                 |                 |                   |
| Less than 9,999                                                                | 26              | (16.4)            |
| 10,000 - 19,999                                                                | 23              | (14.5)            |
| 20,000 - 29,999                                                                | 15              | (9.4)             |
| 30,000 - 39,999                                                                | 7               | (4.4)             |
| 40,000 - 49,999                                                                | 6               | (3.8)             |
| 50,000 - 59,999                                                                | 12              | (7.5)             |
| 60,000 - 69,999                                                                | 12              | (7.5)             |
| 70,000 or more                                                                 | 58              | (36.5)            |
| <b>Marital Status</b>                                                          |                 |                   |

|                                        |     |        |
|----------------------------------------|-----|--------|
| Single/never married                   | 151 | (95)   |
| Married                                | 6   | (3.8)  |
| Divorced                               | 1   | (0.6)  |
| Separated                              | 1   | (0.6)  |
| <b>Sexual Identity</b>                 |     |        |
| Gay                                    | 144 | (90.6) |
| Bisexual                               | 13  | (8.2)  |
| Straight                               | 1   | (0.6)  |
| Other: "I get down with whatever"      | 1   | (0.6)  |
| <b>Sex with a Female past 6 months</b> | 67  | (42.1) |
